# Supplementary material for: Calibrating a Comprehensive Immune Age Metric to Analyze the Cross Sectional Age-Related Decline in Cardiorespiratory Fitness
Source: MDPI journal article supplement (doi:10.3390/biology11111576), 2022-10-27
Supplement: s1 [file s1]

# Supplemental Material

to

## Calibrating a Comprehensive Immune Age Metric to Analyze the Cross Sectional Age-Related Decline in Cardiorespiratory Fitness

|                                                                                                                                                      |    |
|------------------------------------------------------------------------------------------------------------------------------------------------------|----|
| Supplemental Material.....                                                                                                                           | 1  |
| 1 Supplemental Tables .....                                                                                                                          | 2  |
| <b>Table S1:</b> Panel description and material for PBMC staining.....                                                                               | 2  |
| <b>Table S2:</b> List of 65 variables with cellular frequencies. ....                                                                                | 3  |
| <b>Table S3:</b> Fitted principal component regression model predicting the IMM-AGE metric.....                                                      | 4  |
| <b>Table S4:</b> Comparison of in multiple logistic regression models including both chronological age and immune age metrics as predictors. ....    | 5  |
| <b>Table S5:</b> Comparison of different age metrics (chronological age and immunosenescence biomarkers) predicting low CRF in separate models. .... | 6  |
| 2 Supplemental Figures .....                                                                                                                         | 7  |
| <b>Figure S1:</b> Gating strategy with general overview of lymphocyte and monocyte subpopulations .....                                              | 7  |
| <b>Figure S2:</b> Gating strategy for T cell subpopulations. ....                                                                                    | 8  |
| <b>Figure S3:</b> Correlation between IMM-AGE and 65 relative cellular frequencies .....                                                             | 9  |
| <b>Figure S4:</b> Comparison of 16 cellular frequencies between the DVS and IMM-AGE study .....                                                      | 10 |
| <b>Figure S5:</b> Comparison of linear regression lines for twelve candidate predictors related to age between the DVS and IMM-AGE study.....        | 11 |
| 3 Supplemental Code .....                                                                                                                            | 12 |
| <b>Code S1:</b> R script accessing IMM-AGE data and calculating IMMAX. ....                                                                          | 12 |
| 4 Abbreviations.....                                                                                                                                 | 18 |
| 5 References .....                                                                                                                                   | 19 |

## 1 Supplemental Tables

**Table S1:** Panel description and material for PBMC staining.

Panel description, antigens, antibody clones and coupled fluorochromes, distributors and antibody dilution used to stain  $0.2 \times 10^6$  PBMC are listed

| <i>panel</i>            | <i>antigen</i> | <i>clone</i> | <i>fluorochrome</i> | <i>company</i> | <i>dilution 1/x</i> |
|-------------------------|----------------|--------------|---------------------|----------------|---------------------|
| lymphocytes / monocytes | CD19           | H1B19        | BV421               | BD Horizon™    | 200                 |
|                         | CD3            | UCHT1        | BV510               | BD Horizon™    | 400                 |
|                         | live / dead    |              | zombie Yellow       | Biolegend      | 1000                |
|                         | CD16           | 3G8          | FITC                | BD Pharmingen™ | 200                 |
|                         | CD14           | MφP9         | PE                  | BD Pharmingen™ | 500                 |
|                         | CD64           | 10.1         | PE-Cy™7             | BD Pharmingen™ | 200                 |
|                         | CD56           | B159         | APC                 | BD Pharmingen™ | 50                  |
|                         | CD45           | HI30         | Alexa Fluor® 700    | BD Pharmingen™ | 500                 |
| NK + T cells            | CD3            | UCHT1        | BV510               | BD Horizon™    | 400                 |
|                         | live / dead    |              | zombie Yellow       | Biolegend      | 1000                |
|                         | CD8            | RPA-T8       | FITC                | BD Pharmingen™ | 200                 |
|                         | CD28           | CD28.2       | PerCP-Cy™5.5        | BD Pharmingen™ | 100                 |
|                         | CD57           | NK-1         | PE                  | BD Pharmingen™ | 800                 |
|                         | CD56           | B159         | PE-CF594            | BD Pharmingen™ | 100                 |
|                         | CD197 (CCR7)   | 150503       | Alexa Fluor® 647    | BD Pharmingen™ | 50                  |
|                         | CD4            | RPA-T4       | APC-H7              | BD Pharmingen™ | 100                 |
|                         | CD45RA         | HI100        | Alexa Fluor® 700    | BD Pharmingen™ | 400                 |

**Table S2:** List of 65 variables with cellular frequencies.

List of 65 variables with cellular frequencies reported in the supplementary Table sTable5 ([https://static-content.springer.com/esm/art%3A10.1038%2Fs41591-019-0381-y/MediaObjects/41591\\_2019\\_381\\_MOESM3\\_ESM.xlsx](https://static-content.springer.com/esm/art%3A10.1038%2Fs41591-019-0381-y/MediaObjects/41591_2019_381_MOESM3_ESM.xlsx)) of the original IMM-AGE study (Alpert et al. 2019) with grey shaded entries indicating candidate items potentially shared with the DVS data. Bold codes indicate the abbreviations used in figures and tables.

|                                                                         |                                            |
|-------------------------------------------------------------------------|--------------------------------------------|
| basophils                                                               | HLAD <sup>R</sup> negCD38posCD4pos.T.cells |
| B.cells ( <b>B</b> )                                                    | HLAD <sup>R</sup> posCD38posCD4pos.T.cells |
| NK.cells ( <b>NK</b> )                                                  | HLAD <sup>R</sup> negCD38posCD8pos.T.cells |
| T.cells ( <b>T</b> )                                                    | HLAD <sup>R</sup> posCD38posCD8pos.T.cells |
| CD161negCD45RApos.Tregs                                                 | HLAD <sup>R</sup> pos.NK.cells             |
| CD161posCD45RApos.Tregs                                                 | ICOSposCD4pos.T.cell                       |
| CD161posCD4pos.T.cells                                                  | ICOSposCD8pos.T.cell                       |
| CD161posCD8pos.T.cells                                                  | IgDposCD27neg.B.cells                      |
| CD161pos.NK.cells                                                       | IgDposCD27pos.B.cells                      |
| CD16negCD56bright.NK.cells                                              | lymphocytes                                |
| CD16pos.monocytes ( <b>CD16 mono</b> )                                  | mDCs                                       |
| CD27posCD8pos.T.cells                                                   | memory.B.cells                             |
| CD28negCD8pos.T.cells ( <b>CD8 CD28-</b> )                              | monocytes                                  |
| CD4posCD27pos.T.cells                                                   | naive.B.cells                              |
| CD4posCD28neg.T.cells ( <b>CD4 CD28-</b> )                              | NKT.cells                                  |
| CD4pos.T.cells ( <b>CD4</b> )                                           | PD1posCD4pos.T.cells                       |
| CD57posCD4pos.T.cells                                                   | PD1posCD8pos.T.cells                       |
| CD57posCD8pos.T.cells                                                   | pDCs                                       |
| CD57pos.NK.cells                                                        | plasmablasts                               |
| CD85jposCD4pos.T.cells                                                  | CXCR5+ CD4+T                               |
| CD85jposCD8pos.T.cells                                                  | CXCR5+ CD8pos.T.cells                      |
| CD8pos.T.cells ( <b>CD8</b> )                                           | Th17 CXCR5-CD4pos.T.cells                  |
| CD94posCD4pos.T.cells                                                   | Th17 CXCR5+ CD4pos.T.cells                 |
| CD94posCD8pos.T.cells                                                   | CXCR3negCCR6pos CXCR5+CD8pos.T.cells       |
| CD94pos.NK.cells                                                        | Th1.non.TFH.CD4pos.T.cells                 |
| central.memory.CD4pos.T.cells ( <b>CD4 central mem</b> ) <sup>a</sup>   | Th1.TFH.CD4pos.T.cells                     |
| effector.memory.CD4pos.T.cells ( <b>CD4 effector mem</b> ) <sup>a</sup> | CXCR3posCCR6neg CXCR5+CD8pos.T.cells       |
| naive.CD4pos.T.cells ( <b>CD4 naive</b> )                               | Th2.non.TFH.CD4pos.T.cells                 |
| central.memory.CD8pos.T.cells ( <b>CD8 central mem</b> ) <sup>a</sup>   | Th2.TFH.CD4pos.T.cells                     |
| effector.memory.CD8pos.T.cells ( <b>CD8 effector mem</b> ) <sup>a</sup> | CXCR3negCCR6neg CXCR5+ CD8pos.T.cells      |
| naive.CD8pos.T.cells ( <b>CD8 naive</b> )                               | transitional.B.cells                       |
| effector.CD4pos.T.cells                                                 | Tregs                                      |
| effector.CD8pos.T.cells                                                 |                                            |

<sup>a</sup> Note that CD4 and CD8 memory cell frequencies (**CD4 mem**, **CD8 mem**) were computed as added effector and central memory frequencies from the corresponding subsets

**Table S3:** Fitted principal component regression model predicting the IMM-AGE metric.

Sample standard deviations ( $SD_i$ ) of predictors ( $x_i$ ) from the IMM-AGE study (Alpert et al. 2019) and coefficients ( $\beta_i$ ) of the principal component regression model predicting the logit-transformed IMM-AGE metric  $logit.IMM.AGE = \beta_0 + \sum_{i=1}^5 \beta_i \times x_i / SD_i$ , which is then used to calculate the approximation as  $IMMAX = \exp(logit.IMM.AGE) / (1 + \exp(logit.IMM.AGE))$ .

| <i>Index i</i> | <i>Predictor <math>x_i</math></i> | <i><math>SD_i</math></i> | <i><math>\beta_i</math></i> |
|----------------|-----------------------------------|--------------------------|-----------------------------|
| 0              | (Intercept)                       | —                        | 0.0248                      |
| 1              | log CD8 mem/naive                 | 1.6800                   | 0.3962                      |
| 2              | logit CD8 CD28-                   | 1.4338                   | 0.3267                      |
| 3              | log CD4 mem/naive                 | 1.0774                   | 0.2549                      |
| 4              | log NK/T                          | 1.0540                   | 0.1623                      |
| 5              | log CD4/CD8                       | 0.6836                   | 0.0437                      |

**Table S4:** Comparison of in multiple logistic regression models including both chronological age and immune age metrics as predictors.

Odds ratios (95%-CI) from separate multiple logistic regression models fitted to the subsample of 547 complete observations with 199 events of low cardiorespiratory fitness (CRF) predicting the probability of low CRF by different immunosenescence biomarkers in addition to chronological age, with continuous predictors z-standardized to zero mean and unit variance, and adjusting the analyses for sex, obesity (BMI category) and physical activity level. For model comparison, Akaike's information criterion (AIC) is reported with lower values indicating improved fit.

| Predictor                                 | Immunosenescence biomarker included as predictor |                            |                            |                            |                            |                            |
|-------------------------------------------|--------------------------------------------------|----------------------------|----------------------------|----------------------------|----------------------------|----------------------------|
|                                           | IMMAX                                            | log CD8 mem/naive          | logit CD8 CD28-            | log NK/T                   | log CD4 mem/naive          | log CD4/CD8                |
| <b>Immunosenescence</b><br>(standardized) | 1.29 *<br>(1.03 – 1.62)                          | 1.32 *<br>(1.06 – 1.66)    | 1.18<br>(0.97 – 1.44)      | 1.06<br>(0.87 – 1.29)      | 1.03<br>(0.85 – 1.26)      | 0.98<br>(0.80 – 1.20)      |
| <b>Age</b><br>(standardized)              | 1.03<br>(0.83 – 1.29)                            | 1.01<br>(0.81 – 1.27)      | 1.11<br>(0.91 – 1.36)      | 1.16<br>(0.96 – 1.41)      | 1.16<br>(0.95 – 1.41)      | 1.18<br>(0.96 – 1.45)      |
| <b>Sex</b>                                |                                                  |                            |                            |                            |                            |                            |
| males<br>vs females                       | 0.93<br>(0.62 – 1.40)                            | 0.95<br>(0.63 – 1.42)      | 1.00<br>(0.67 – 1.49)      | 1.01<br>(0.67 – 1.51)      | 1.03<br>(0.68 – 1.53)      | 1.04<br>(0.69 – 1.54)      |
| <b>BMI category</b>                       |                                                  |                            |                            |                            |                            |                            |
| overweight<br>vs normal                   | 2.04 **<br>(1.33 – 3.14)                         | 2.06 **<br>(1.34 – 3.18)   | 1.98 **<br>(1.29 – 3.04)   | 1.96 **<br>(1.28 – 3.01)   | 1.97 **<br>(1.28 – 3.02)   | 1.96 **<br>(1.28 – 3.00)   |
| obese<br>vs normal                        | 6.01 ***<br>(3.45 – 10.73)                       | 6.12 ***<br>(3.52 – 10.94) | 6.09 ***<br>(3.50 – 10.85) | 6.13 ***<br>(3.53 – 10.91) | 6.16 ***<br>(3.55 – 10.97) | 6.19 ***<br>(3.57 – 11.03) |
| <b>Physical activity</b>                  |                                                  |                            |                            |                            |                            |                            |
| still acceptable<br>vs low                | 0.64 *<br>(0.41 – 0.99)                          | 0.64 *<br>(0.41 – 0.99)    | 0.65<br>(0.42 – 1.00)      | 0.66<br>(0.43 – 1.01)      | 0.67<br>(0.43 – 1.02)      | 0.67<br>(0.43 – 1.02)      |
| satisfactory<br>vs low                    | 0.43 **<br>(0.22 – 0.77)                         | 0.42 **<br>(0.22 – 0.76)   | 0.43 **<br>(0.23 – 0.78)   | 0.43 **<br>(0.23 – 0.77)   | 0.42 **<br>(0.22 – 0.77)   | 0.42 **<br>(0.22 – 0.77)   |
| high<br>vs low                            | 0.43 *<br>(0.20 – 0.88)                          | 0.43 *<br>(0.20 – 0.88)    | 0.43 *<br>(0.20 – 0.88)    | 0.44 *<br>(0.20 – 0.90)    | 0.44 *<br>(0.20 – 0.90)    | 0.44 *<br>(0.20 – 0.90)    |
| <b>AIC</b>                                | 656.814                                          | 655.602                    | 658.768                    | 661.212                    | 661.474                    | 661.546                    |

Odds ratios (95%-CI); \*  $P < .05$ ; \*\*  $P < .01$ ; \*\*\*  $P < .001$

**Table S5:** Comparison of different age metrics (chronological age and immunosenescence biomarkers) predicting low CRF in separate models.

Odds ratios (95%-CI) from multiple logistic regression models fitted to the subsample of 547 complete observations with 199 events of low cardiorespiratory fitness (CRF) predicting the probability of low CRF by chronological age in comparison to different immunosenescence biomarkers, with continuous predictors z-standardized to zero mean and unit variance, and adjusting the analyses for obesity (BMI category) and physical activity level. For model comparison, Akaike's information criterion (AIC) is reported with lower values indicating improved fit.

| <i>Predictors</i>                   | Chronological age          | Immunosenescence biomarkers |                            |                            |                            |                            |                            |
|-------------------------------------|----------------------------|-----------------------------|----------------------------|----------------------------|----------------------------|----------------------------|----------------------------|
|                                     |                            | IMMAX                       | log CD8 mem/naive          | logit CD8 CD28-            | log NK/T                   | log CD4 mem/naive          | log CD4/CD8                |
| <b>Age metric</b><br>(standardized) | 1.17<br>(0.97 – 1.42)      | 1.30 **<br>(1.07 – 1.57)    | 1.32 **<br>(1.10 – 1.60)   | 1.22 *<br>(1.01 – 1.48)    | 1.08<br>(0.90 – 1.31)      | 1.08<br>(0.89 – 1.30)      | 1.04<br>(0.86 – 1.26)      |
| <b>BMI category</b>                 |                            |                             |                            |                            |                            |                            |                            |
| overweight vs normal                | 1.97 **<br>(1.30 – 3.00)   | 2.03 ***<br>(1.34 – 3.07)   | 2.04 ***<br>(1.35 – 3.10)  | 2.05 ***<br>(1.36 – 3.11)  | 2.07 ***<br>(1.37 – 3.13)  | 2.08 ***<br>(1.38 – 3.15)  | 2.08 ***<br>(1.38 – 3.15)  |
| obese vs normal                     | 6.23 ***<br>(3.62 – 11.01) | 5.96 ***<br>(3.45 – 10.56)  | 6.07 ***<br>(3.52 – 10.73) | 6.28 ***<br>(3.65 – 11.08) | 6.43 ***<br>(3.74 – 11.34) | 6.46 ***<br>(3.76 – 11.39) | 6.53 ***<br>(3.80 – 11.52) |
| <b>Physical activity</b>            |                            |                             |                            |                            |                            |                            |                            |
| still acceptable vs low             | 0.67<br>(0.43 – 1.03)      | 0.64 *<br>(0.41 – 0.99)     | 0.64 *<br>(0.41 – 0.99)    | 0.66<br>(0.43 – 1.02)      | 0.68<br>(0.44 – 1.04)      | 0.69<br>(0.45 – 1.05)      | 0.69<br>(0.45 – 1.06)      |
| satisfactory vs low                 | 0.43 **<br>(0.23 – 0.77)   | 0.42 **<br>(0.22 – 0.76)    | 0.41 **<br>(0.22 – 0.75)   | 0.43 **<br>(0.23 – 0.78)   | 0.43 **<br>(0.23 – 0.78)   | 0.43 **<br>(0.23 – 0.77)   | 0.43 **<br>(0.23 – 0.78)   |
| high vs low                         | 0.44 *<br>(0.20 – 0.90)    | 0.43 *<br>(0.19 – 0.87)     | 0.43 *<br>(0.19 – 0.87)    | 0.44 *<br>(0.20 – 0.89)    | 0.45 *<br>(0.21 – 0.92)    | 0.46 *<br>(0.21 – 0.92)    | 0.46 *<br>(0.21 – 0.93)    |
| AIC                                 | 657.609                    | 653.022                     | 651.678                    | 655.881                    | 659.500                    | 659.602                    | 660.021                    |

*Odds Ratios (95%-CI); \* P<.05 \*\* P<.01 \*\*\* P<.001*

## 2 Supplemental Figures

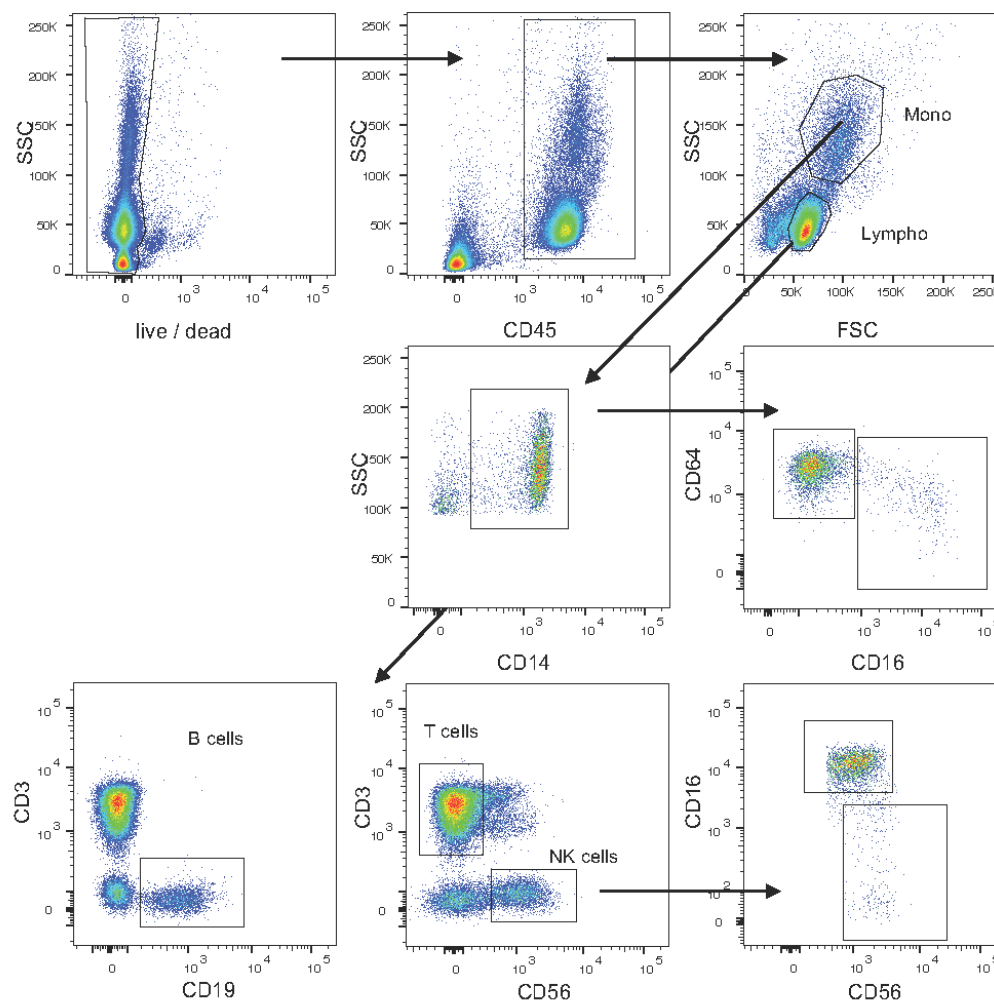

**Figure S1:** Gating strategy with general overview of lymphocyte and monocyte subpopulations

General overview of lymphocyte and monocyte subpopulations. Lymphocytes and monocytes are identified by CD45 and SSC characteristics. Based on CD14 gating, non-classical CD16<sup>+</sup> and classical CD64<sup>+</sup> monocytes can be identified. Lymphocytes were further sub-gated to identify B cells (CD19<sup>+</sup>), T cells (CD3<sup>+</sup>CD56<sup>-</sup>), NK cells (CD56<sup>+</sup>CD3<sup>-</sup>) and CD16<sup>+</sup> CD56<sup>dim</sup> and CD16<sup>+</sup> CD56<sup>bright</sup> NK cells.

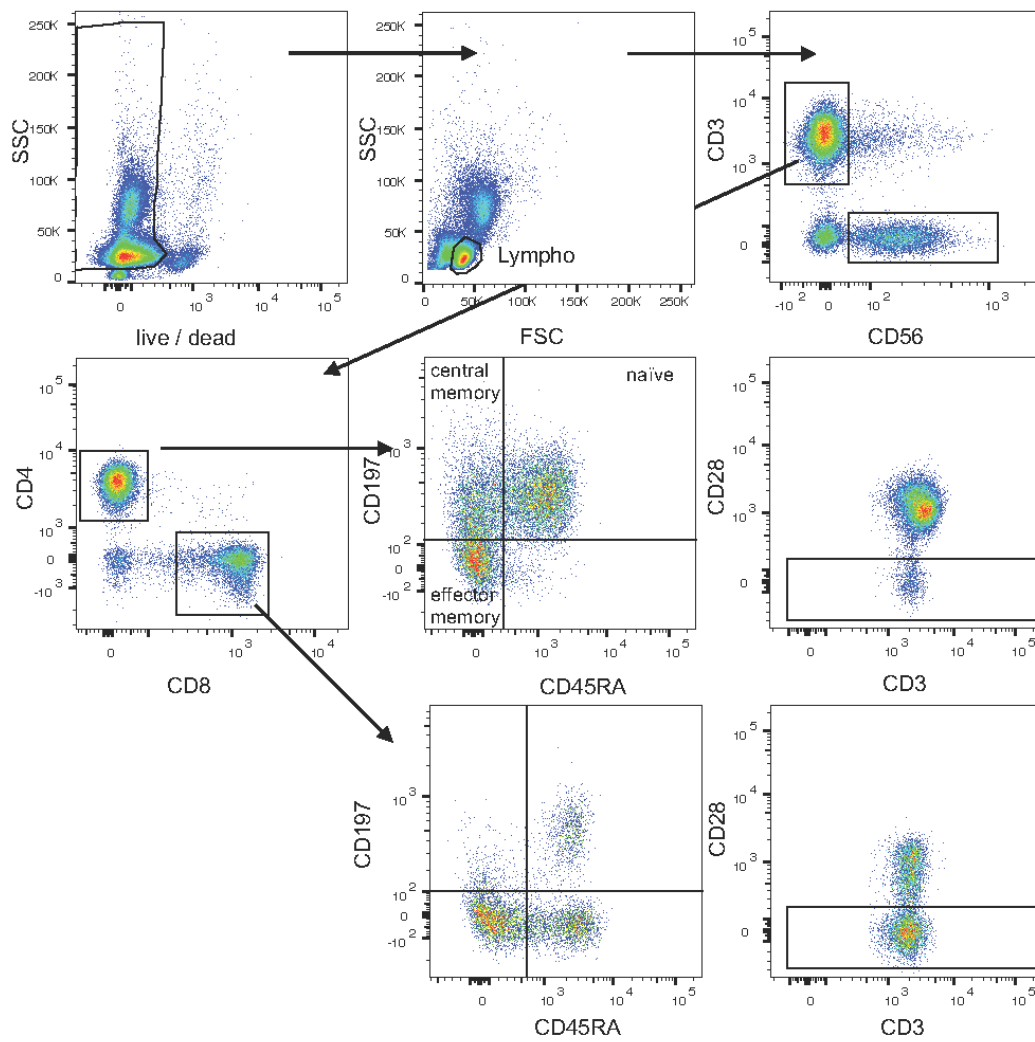

**Figure S2:** Gating strategy for T cell subpopulations.

NK and T cells were separated by CD3 and CD56. T helper cells and cytotoxic T cells were identified by CD4 and CD8 expression. Naïve, central and effector memory cells were separated within CD8 and CD4 T cells by CD45RA and CD197 staining. CD28<sup>-</sup> cells were sub-gated from CD8 and CD4 T cells.

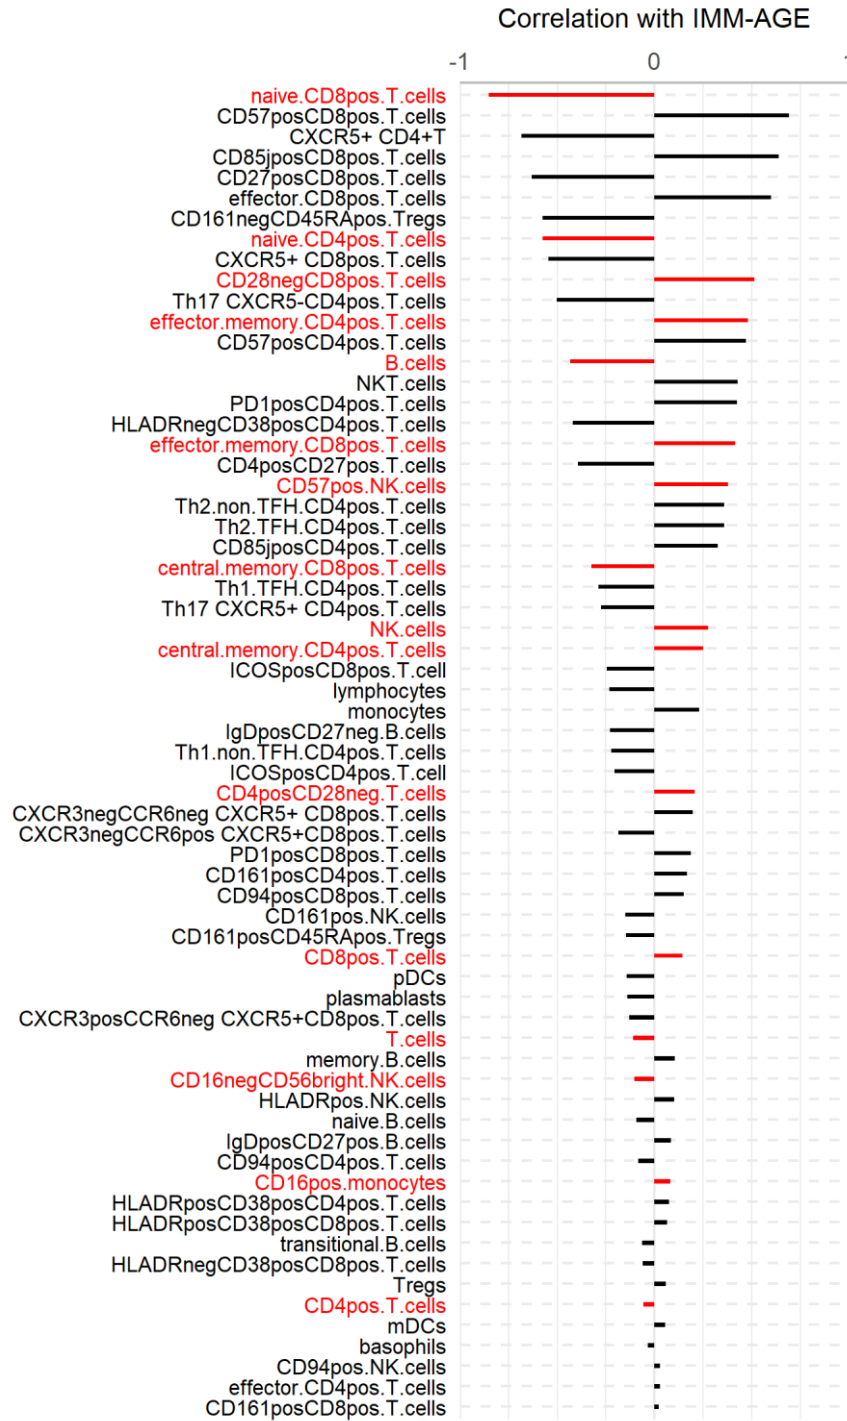

**Figure S3:** Correlation between IMM-AGE and 65 relative cellular frequencies

Bar chart of Pearson's correlation coefficients ordered by absolute values for the original 434 IMM-AGE observations (Alpert et al. 2019) related to cellular frequency data for 65 variables with bars and entries outlined in red indicating candidate variables potentially shared with the DVS.

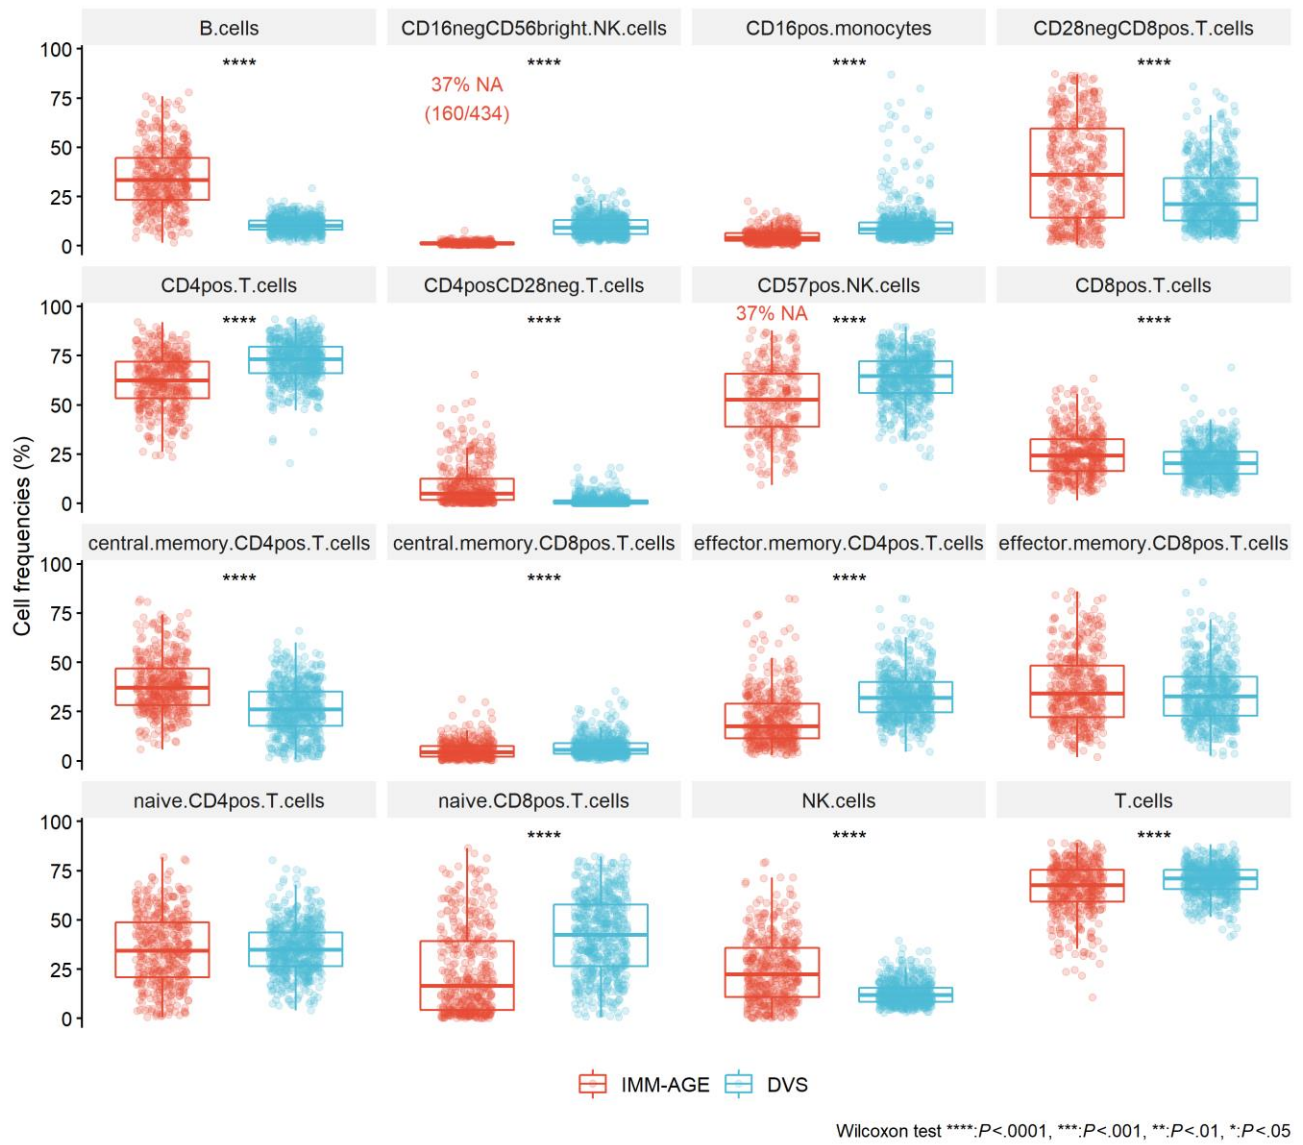

**Figure S4:** Comparison of 16 cellular frequencies between the DVS and IMM-AGE study

Box plots and Wilcoxon test results comparing the DVS data to the distributions of 16 shared (out of 65, cf. Table S2) raw cellular frequencies reported as percentages supplemental to the original IMM-AGE data (Alpert et al. 2019). Note the high number of missing values (NA) for the CD56-bright and CD57pos NK cells in the original study.

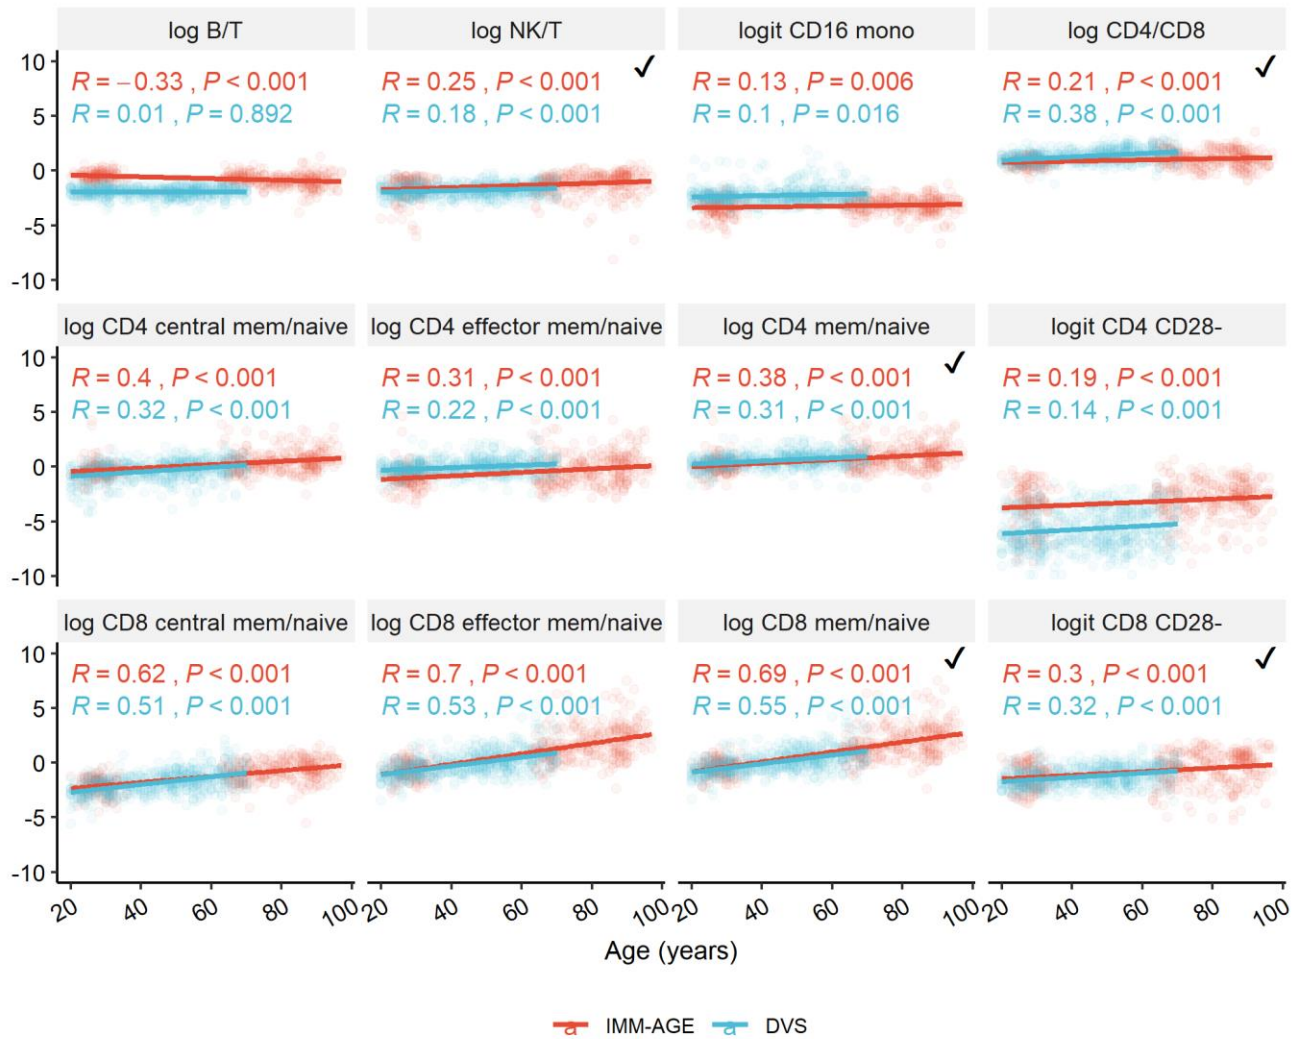

✓: included for further analyses

**Figure S5:** Comparison of linear regression lines for twelve candidate predictors related to age between the DVS and IMM-AGE study

Linear regression lines with Pearson correlation coefficients (R) for twelve candidate predictors related to age in the DVS compared to the original IMM-AGE study representing log-transformed ratios for compositional data and logit-transformed percentage cell frequencies. Check marks indicate predictors included in the final analysis shown in Figure 1.

### 3 Supplemental Code

**Code S1:** R script accessing IMM-AGE data and calculating IMMAX.

```
library(tidyverse)

## -- Attaching packages ----- tidyverse 1.3.1 --

## v ggplot2 3.3.5      v purrr  0.3.4
## v tibble  3.1.6      v dplyr  1.0.8
## v tidyr   1.2.0      v stringr 1.4.0
## v readr   2.1.2      v forcats 0.5.1

## -- Conflicts ----- tidyverse_conflicts() --
## x dplyr::filter() masks stats::filter()
## x dplyr::lag()    masks stats::lag()

# read Supplemental Tables from Alpert et al. (2019)
library(readxl)
url1<-"https://static-content.springer.com/esm/art%3A10.1038%2Fs41591-019-0381-y/MediaOb
jects/41591_2019_381_MOESM3_ESM.xlsx"
tf <- tempfile(fileext = ".xlsx")
curl::curl_download(url1, tf)
# cell frequency data in sTable 5 of Alpert et al. (2019)
Alpert.cell.frequencies <- read_excel(tf, sheet=5L, skip=2, col_types = "numeric", na=c("",
"NA"))
# IMM-AGE values in sTable 11 of Alpert et al. (2019)
Alpert.index <- read_excel(tf, sheet=11L, skip=2, col_types = "numeric", na=c("", "NA"))
unlink(tf)

Alpert.cell.frequencies$age<-NULL # do not overwrite age in Alpert.index
# list of raw cell frequency variables in Table S2
names(Alpert.cell.frequencies[-(1:3)])

## [1] "basophils"
## [2] "B.cells"
## [3] "CD161negCD45RApos.Tregs"
## [4] "CD161posCD45RApos.Tregs"
## [5] "CD161posCD4pos.T.cells"
## [6] "CD161posCD8pos.T.cells"
## [7] "CD161pos.NK.cells"
## [8] "CD16negCD56bright.NK.cells"
## [9] "CD16pos.monocytes"
## [10] "CD27posCD8pos.T.cells"
## [11] "CD28negCD8pos.T.cells"
## [12] "CD4posCD27pos.T.cells"
## [13] "CD4posCD28neg.T.cells"
## [14] "CD4pos.T.cells"
## [15] "CD57posCD4pos.T.cells"
## [16] "CD57posCD8pos.T.cells"
## [17] "CD57pos.NK.cells"
## [18] "CD85jposCD4pos.T.cells"
## [19] "CD85jposCD8pos.T.cells"
## [20] "CD8pos.T.cells"
## [21] "CD94posCD4pos.T.cells"
## [22] "CD94posCD8pos.T.cells"
## [23] "CD94pos.NK.cells"
## [24] "central.memory.CD4pos.T.cells"
## [25] "central.memory.CD8pos.T.cells"
```

```

## [26] "effector.CD4pos.T.cells"
## [27] "effector.CD8pos.T.cells"
## [28] "effector.memory.CD4pos.T.cells"
## [29] "effector.memory.CD8pos.T.cells"
## [30] "HLADRnegCD38posCD4pos.T.cells"
## [31] "HLADRposCD38posCD4pos.T.cells"
## [32] "HLADRnegCD38posCD8pos.T.cells"
## [33] "HLADRposCD38posCD8pos.T.cells"
## [34] "HLADRpos.NK.cells"
## [35] "ICOSposCD4pos.T.cell"
## [36] "ICOSposCD8pos.T.cell"
## [37] "IgDposCD27neg.B.cells"
## [38] "IgDposCD27pos.B.cells"
## [39] "lymphocytes"
## [40] "mDCs"
## [41] "memory.B.cells"
## [42] "monocytes"
## [43] "naive.B.cells"
## [44] "naive.CD4pos.T.cells"
## [45] "naive.CD8pos.T.cells"
## [46] "NK.cells"
## [47] "NKT.cells"
## [48] "PD1posCD4pos.T.cells"
## [49] "PD1posCD8pos.T.cells"
## [50] "pDCs"
## [51] "plasmablasts"
## [52] "T.cells"
## [53] "CXCR5+ CD4+T"
## [54] "CXCR5+ CD8pos.T.cells"
## [55] "Th17 CXCR5-CD4pos.T.cells"
## [56] "Th17 CXCR5+ CD4pos.T.cells"
## [57] "CXCR3negCCR6pos CXCR5+CD8pos.T.cells"
## [58] "Th1.non.TFH.CD4pos.T.cells"
## [59] "Th1.TFH.CD4pos.T.cells"
## [60] "CXCR3posCCR6neg CXCR5+CD8pos.T.cells"
## [61] "Th2.non.TFH.CD4pos.T.cells"
## [62] "Th2.TFH.CD4pos.T.cells"
## [63] "CXCR3negCCR6neg CXCR5+ CD8pos.T.cells"
## [64] "transitional.B.cells"
## [65] "Tregs"

# merge cell frequencies with IMM-AGE metric
Alpert.data<-merge(Alpert.index,Alpert.cell.frequencies)

# List of variables potentially compatible to the DVS
compatible<-c(
  "B.cells",
  "NK.cells",
  "T.cells",
  "CD16negCD56bright.NK.cells",
  "CD16pos.monocytes",
  "CD28negCD8pos.T.cells",
  "CD4posCD28neg.T.cells",
  "CD4pos.T.cells",
  "CD57pos.NK.cells",
  "CD8pos.T.cells",
  "central.memory.CD4pos.T.cells",
  "central.memory.CD8pos.T.cells",

```

```

"effector.memory.CD4pos.T.cells",
"effector.memory.CD8pos.T.cells",
"naive.CD4pos.T.cells",
"naive.CD8pos.T.cells"
)

# Supplemental Figure Figure S3
# Pearson's correlations of 65 relative cell frequencies with IMM-AGE
Alpert.cor<-Alpert.data[names(Alpert.data)[c(4,6:70)]]
cors<-cor(Alpert.cor,method = 'pearson',use="pairwise.complete.obs")
rp<-cors[-1,1] # select correlations with IMM-AGE
# build data frame for plotting
rp.names<-rownames(cors)[-1]
cor.IMM.AGE<-cbind.data.frame(rp.names,rp)
cor.IMM.AGE$abs.rp<-abs(cor.IMM.AGE$rp)
cor.IMM.AGE$compatible<-ifelse(cor.IMM.AGE$rp.names %in% compatible,T,F)
# sort by descending absolute value of Person's correlation with IMM-AGE
cor.IMM.AGE<-cor.IMM.AGE %>%
  arrange(desc(abs.rp))
# outline candidate variables in red
a <- ifelse(cor.IMM.AGE$compatible, "red", "black")
color.vector=rev(a)

correlations=as.matrix(t(cor.IMM.AGE[65:1,2,drop=F]))
# plot data
df0<-arrange(data.frame(rp=t(correlations),labs=colnames(correlations)),abs(rp))
df0<-data.frame(rp=t(correlations),labs=colnames(correlations),color=color.vector)
df0$labs <- factor(df0$labs, levels = df0$labs)
# plot Figure S3
SUP.Figure.S3<-ggplot(data=df0,aes(x=labs,y=rp,fill=color))+
  geom_col(width=0.2)+ coord_flip() +
  scale_fill_manual(values = c('black','red')) +
  scale_y_continuous(position = 'right',
    # name=expression(rho),
    limits = c(-1,1),
    breaks = seq(-1,1,1),
    minor_breaks = seq(-1,1,.25),
    expand = expansion()
  ) +
  labs(title="Correlation with IMM-AGE")+
  theme_minimal() +
  theme(
    plot.title = element_text(hjust=0.5,size=8),
    axis.text.y = element_text(colour = color.vector,size=5),
    axis.text.x = element_text(size=6),
    axis.title.y = element_blank(),
    axis.title.x = element_blank(),#element_text(face = "italic"),
    axis.ticks.y = element_blank(),
    axis.line.x.top = element_line(colour = 'grey'),
    panel.grid.major.y = element_line(linetype=2),
    legend.position = "none"
  )

## Warning: Vectorized input to `element_text()` is not officially supported.
## Results may be unexpected or may change in future versions of ggplot2.

```

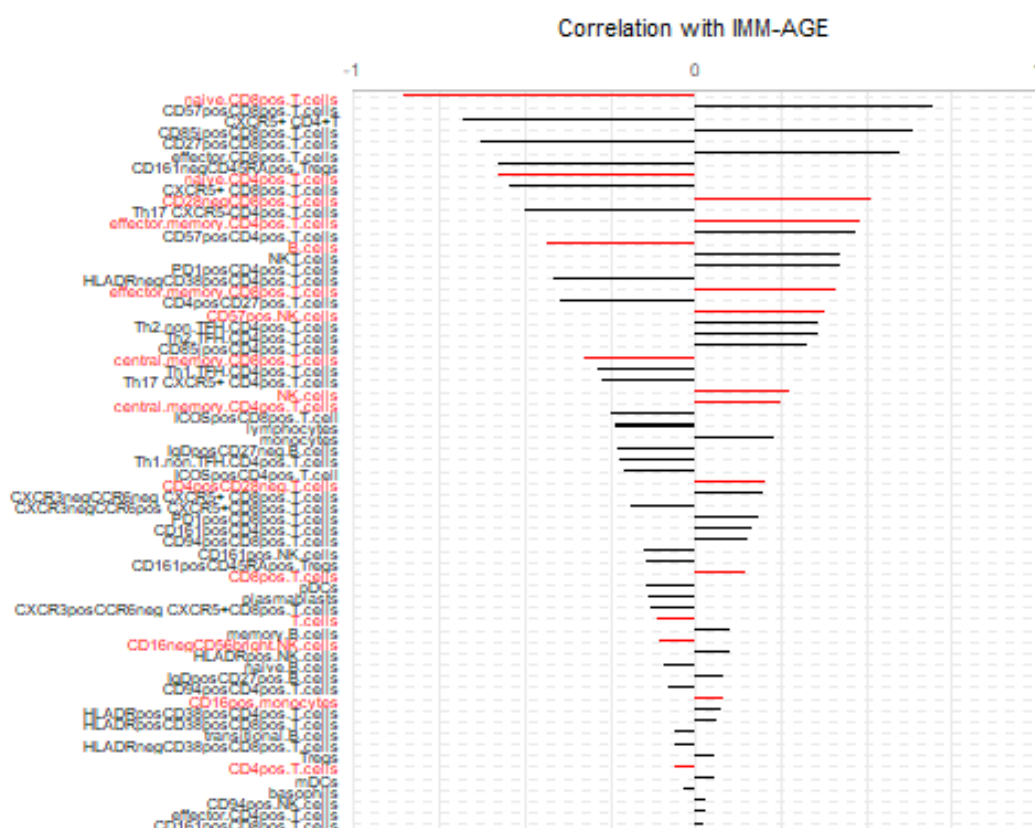

*# Approximation of IMM-AGE by principal component analysis using package pls*  
library(pls)

##

## Attache Paket: 'pls'

## Das folgende Objekt ist maskiert 'package:stats':

##

## loadings

*# data frame with selected predictors*

```
nam.pcr<-c("log.NK.T","log.T.CD4pos.CD8pos",
           "log.T.CD8.mem.naive","log.T.CD4.mem.naive",
           "logit.CD8posCD28neg.T.cells")
```

*# calculate predictors*

```
Alpert.data<-within(Alpert.data,
```

```
{
```

```
  log.NK.T <- log(NK.cells/T.cells)
```

```
  logit.CD8posCD28neg.T.cells<-log(CD28negCD8pos.T.cells/(100-CD28negCD8pos.T.cells))
```

```
  log.T.CD4pos.CD8pos=log(CD4pos.T.cells/CD8pos.T.cells)
```

```
  log.T.CD4.mem.naive=log((central.memory.CD4pos.T.cells+effector.memory.CD4pos.T.cel  
ls)/naive.CD4pos.T.cells)
```

```
  log.T.CD8.mem.naive=log((central.memory.CD8pos.T.cells+effector.memory.CD8pos.T.cel  
ls)/naive.CD8pos.T.cells)
```

```
}
```

```
)
```

*# reduced data for fitting*

```
Alpert.index.pcr<-Alpert.data[,which(names(Alpert.data) %in% nam.pcr)]
```

*# fit to Logit-transformed IMM-AGE ranging between 0 and 1 (including the limits)*

```

# Function to transform rates for beta regression
# because values of 0 and/or 1 may occur, cf.
# Smithson, M., Verkuilen, J., 2006.
# A better lemon squeezer? Maximum-likelihood regression with beta-distributed dependent
variables.
# Psychological Methods 11, 54-71, https://doi.org/10.1037/1082-989X.11.1.54
transform_rate <- function(rate) {
  (rate * (length(rate) - 1) + 0.5)/length(rate)
}
Alpert.index.pcr$y = transform_rate(Alpert.data$`IMM-AGE`)
Alpert.index.pcr$logit.IMM.AGE<-log(Alpert.index.pcr$y/(1-Alpert.index.pcr$y))
Alpert.index.pcr$y<-NULL
# for reproducibility initialize random number generator
set.seed(1000)
pcr.model <- pcr(logit.IMM.AGE~., data = Alpert.index.pcr, scale = TRUE, validation = "CV")
# Model summary
summary(pcr.model)

## Data:      X dimension: 434 5
## Y dimension: 434 1
## Fit method: svdpc
## Number of components considered: 5
##
## VALIDATION: RMSEP
## Cross-validated using 10 random segments.
##      (Intercept)  1 comps  2 comps  3 comps  4 comps  5 comps
## CV           0.9516  0.6923  0.6742  0.6468  0.6247  0.6254
## adjCV        0.9516  0.6906  0.6738  0.6463  0.6241  0.6249
##
## TRAINING: % variance explained
##           1 comps  2 comps  3 comps  4 comps  5 comps
## X              33.66  59.72  79.04  93.80  100.00
## logit.IMM.AGE  47.51  50.45  54.41  58.05  58.07

# note that 4-component model yields lowest prediction error
# therefore, use this model for prediction and calculation of IMMAX
Alpert.data$IMMAX<-plogis(predict(pcr.model,ncomp=4,newdata = Alpert.data))
# Table S3: coefficients from principal component regression
betas<-coef(pcr.model,ncomp=4,intercept = T)
beta<-as.vector(betas)
predictors<-rownames(betas)
beta.df<-cbind.data.frame(predictors,beta)
# Alpert sample SD for scaled predictors
sds<-sapply(Alpert.index.pcr[nam.pcr],sd)
SD<-as.vector(sds)
predictors<-names(sds)
sd.df<-cbind.data.frame(predictors,SD)

# print Table S3
SUP.Table.S1<-merge(beta.df,sd.df,all.x = T)
SUP.Table.S1$i<-seq(0,5,1)
SUP.Table.S1<-SUP.Table.S1 %>%
  mutate(beta.SD=beta/SD) %>%
  relocate(predictors,i,beta,SD,beta.SD)
colnam<-c("Predictor x[i]","i","coefficients beta[i]","SD[i]","beta[i] / SD[i]")
SUP.Table.S1

```

```
##           predictors i      beta      SD      beta.SD
## 1      (Intercept) 0 0.02479763      NA      NA
## 2           log.NK.T 1 0.16234461 1.0539578 0.15403330
## 3      log.T.CD4.mem.naive 2 0.25494849 1.0774117 0.23663052
## 4      log.T.CD4pos.CD8pos 3 0.04371916 0.6835501 0.06395897
## 5      log.T.CD8.mem.naive 4 0.39622466 1.6799502 0.23585500
## 6 logit.CD8posCD28neg.T.cells 5 0.32666790 1.4338448 0.22782655

# Figure 1c: Fit of IMMAX vs IMM-AGE for Alpert
Alpert.data$IMM.AGE<-Alpert.data$`IMM-AGE`
ggplotRegression <- function(fit){

  require(ggplot2)

  ggplot(fit$model, aes_string(x = names(fit$model)[2], y = names(fit$model)[1])) +
    geom_point(col = "#E64B35FF",alpha=0.2) + "#E64B35FF"
    annotate("text", x=0.0,y=0.98,size=3.5,hjust=0,vjust=0.5,
             label= paste("R = ",signif(sqrt(summary(fit)$adj.r.squared), 2),
                           "\nRMSE =",signif(summary(fit)$sigma, 5))) +
    labs(x="IMMAX",y="IMM-AGE",
         title = "IMM-AGE approximation by\nprincipal component regression")
}
Fig1.c<-ggplotRegression(lm(IMM.AGE ~ IMMAX,
                           data = Alpert.data)) +
  # xlim(0,1)+ylim(0,1)+
  geom_abline(intercept = 0, slope = 1,lty=2) +
  scale_x_continuous(limits = c(0,1),breaks = seq(0,1,.2)) +
  scale_y_continuous(limits = c(0,1),breaks = seq(0,1,.2)) +
  theme_classic(11) +
  theme(
    plot.title = element_text(size=10)
  )
Fig1.c
```

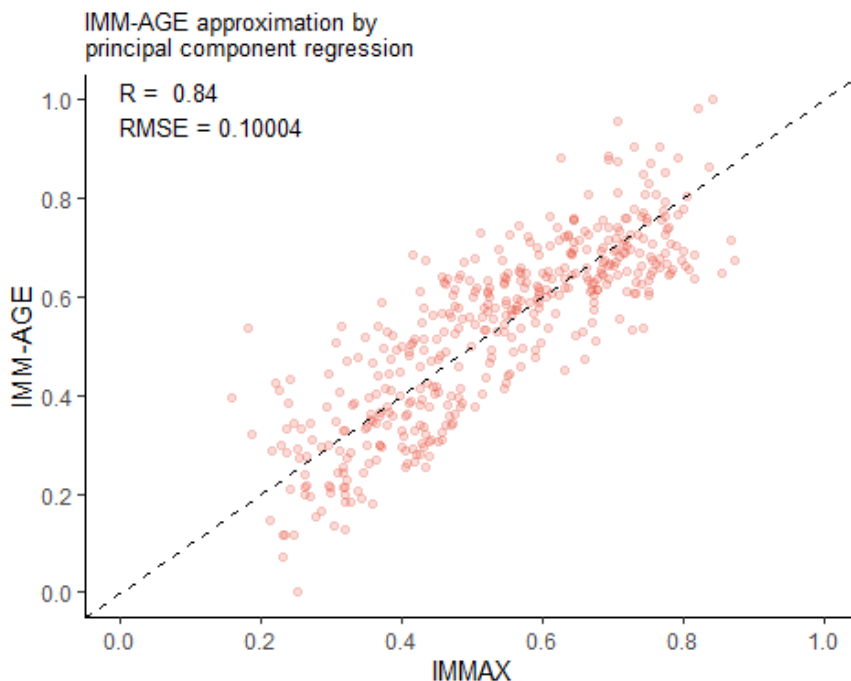

## 4 Abbreviations

|                  |                                                                                                                        |
|------------------|------------------------------------------------------------------------------------------------------------------------|
| <b>#missing</b>  | number of missing observations                                                                                         |
| <b>AIC</b>       | Akaike's information criterion                                                                                         |
| <b>BMI</b>       | body-mass index                                                                                                        |
| <b>CD4</b>       | %CD4-positive T cells                                                                                                  |
| <b>CD8</b>       | %CD8-positive T cells                                                                                                  |
| <b>CD8 CD28-</b> | %CD28-negative CD8-positive T cells                                                                                    |
| <b>CI</b>        | Confidence interval                                                                                                    |
| <b>CRF</b>       | cardiorespiratory fitness                                                                                              |
| <b>DVS</b>       | Dortmund Vital Study (ClinicalTrials.gov Identifier: NCT05155397)                                                      |
| <b>ESM</b>       | Electronic supplemental material                                                                                       |
| <b>FACS</b>      | Fluorescence-activated cell sorting                                                                                    |
| <b>IMMAX</b>     | approximation to IMM-AGE metric (Alpert et al. 2019) by principal component regression, termed <u>Immune Age index</u> |
| <b>log</b>       | natural logarithm                                                                                                      |
| <b>logit</b>     | transformation of a percentage (%p) by $\text{logit}(\%p) = \log(\%p/(100\%-\%p))$                                     |
| <b>mem</b>       | %memory T cells                                                                                                        |
| <b>naïve</b>     | %naïve T cells                                                                                                         |
| <b>NK</b>        | %natural killer cells                                                                                                  |
| <b>OR</b>        | Odds Ratio                                                                                                             |
| <b>PBMC</b>      | Peripheral blood mononuclear cells                                                                                     |
| <b>PWC130</b>    | power output from the physical working capacity test on the bicycle ergometer at 130 bpm standardized for body mass    |
| <b>R</b>         | Pearson's correlation coefficient                                                                                      |
| <b>RMSE</b>      | root mean squared error                                                                                                |
| <b>T</b>         | %T cells                                                                                                               |

## 5 References

Alpert A, Pickman Y, Leipold M, Rosenberg-Hasson Y, Ji X, Gaujoux R, Rabani H, Starosvetsky E, Kveler K, Schaffert S, Furman D, Caspi O, Rosenschein U, Khatri P, Dekker CL, Maecker HT, Davis MM, Shen-Orr SS (2019) A clinically meaningful metric of immune age derived from high-dimensional longitudinal monitoring. *Nature Medicine* 25 (3):487-495. <https://doi.org/10.1038/s41591-019-0381-y>
